# Supplementary material
Source: Springer Nature journal article supplement (https://www.springermedizin.de/resource/supplementary/13058_2010_2596_MOESM5_ESM.pdf/9701780)

**A**

|                   | Claudin-low |     |       | Basal-like |     |       | HER2-enriched |     |       | Luminal B |      |       | Luminal A |      |       | Normal-like |     |       |
|-------------------|-------------|-----|-------|------------|-----|-------|---------------|-----|-------|-----------|------|-------|-----------|------|-------|-------------|-----|-------|
|                   | UNC         | NKI | MDACC | UNC        | NKI | MDACC | UNC           | NKI | MDACC | UNC       | NKI  | MDACC | UNC       | NKI  | MDACC | UNC         | NKI | MDACC |
|                   | UNC         | NKI | MDACC | UNC        | NKI | MDACC | UNC           | NKI | MDACC | UNC       | NKI  | MDACC | UNC       | NKI  | MDACC | UNC         | NKI | MDACC |
| Num. Patients     | 37          | 21  | 18    | 73         | 42  | 15    | 39            | 49  | 28    | 62        | 69   | 27    | 99        | 84   | 37    | 10          | 30  | 8     |
| Prevalence        | 12%         | 7%  | 14%   | 23%        | 14% | 11%   | 12%           | 17% | 21%   | 19%       | 23%  | 20%   | 31%       | 28%  | 28%   | 3%          | 10% | 6%    |
| ER+               | 12%         | 33% | 22%   | 11%        | 19% | 0%    | 36%           | 59% | 29%   | 91%       | 100% | 96%   | 91%       | 100% | 97%   | 44%         | 93% | 100%  |
| PR+               | 23%         | -   | 22%   | 6%         | -   | 13%   | 30%           | -   | 25%   | 53%       | -    | 41%   | 74%       | -    | 70%   | 22%         | -   | 63%   |
| HER2+             | 22%         | -   | 6%    | 9%         | -   | 13%   | 66%           | -   | 71%   | 24%       | -    | 15%   | 8%        | -    | 11%   | 67%         | -   | 25%   |
| HER2-/ER-         | 70%         | -   | 72%   | 82%        | -   | 87%   | 25%           | -   | 18%   | 8%        | -    | 4%    | 6%        | -    | 3%    | 13%         | -   | 0%    |
| HER2-/ER-/PR-     | 71%         | -   | 61%   | 80%        | -   | 73%   | 22%           | -   | 14%   | 9%        | -    | 4%    | 4%        | -    | 3%    | 0%          | -   | 0%    |
| Node-             | 58%         | 48% | 28%   | 63%        | 60% | 20%   | 26%           | 47% | 21%   | 44%       | 42%  | 33%   | 51%       | 58%  | 41%   | 33%         | 50% | 25%   |
| Grade 3           | 77%         | 38% | 61%   | 88%        | 86% | 93%   | 55%           | 61% | 89%   | 62%       | 41%  | 46%   | 30%       | 13%  | 27%   | 63%         | 20% | 50%   |
| Tumor size > 2 cm | 74%         | 38% | 78%   | 77%        | 62% | 80%   | 93%           | 57% | 79%   | 85%       | 52%  | 96%   | 66%       | 36%  | 91%   | 89%         | 40% | 88%   |
| pCR               | -           | -   | 39%   | -          | -   | 73%   | -             | -   | 39%   | -         | -    | 19%   | -         | -    | 0%    | -           | -   | 0%    |

**B**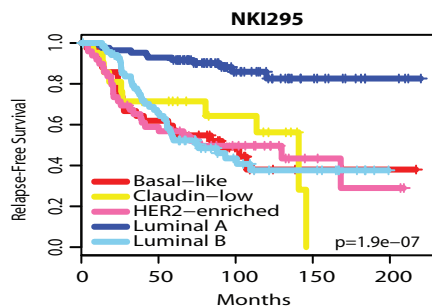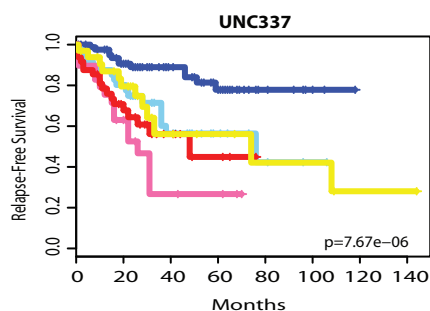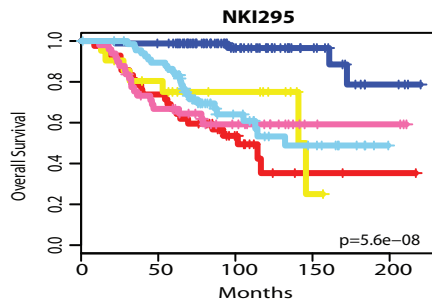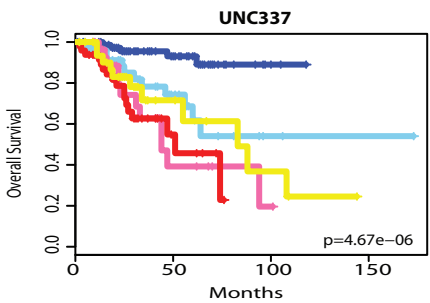

Supplement: MOESM5 [file 9701780]
